# Supplementary material for: A new family of dinuclear lanthanide complexes exhibiting luminescence, magnetic entropy changes and single molecule magnet behaviors
Source: Royal Society of Chemistry journal article supplement (doi:10.1039/d0ce01477j), 2020-11-12
Supplement: d0ce01477j1.pdf [file d0ce01477j1.pdf]

## A new family of dinuclear lanthanide complexes exhibiting luminescence, magnetic entropy changes and single molecule magnet

Lu Dong<sup>a</sup>, Ying-Bing Lu<sup>\*, a</sup>, Shui-Dong Zhu<sup>c</sup>, Jun-Wei Wu<sup>a</sup>, Xin-Ting Zhang<sup>a</sup>, Yi Liao<sup>a</sup>, Cai-Ming Liu<sup>\*, b</sup>, Sui-Jun Liu<sup>c</sup>, Yong-Rong Xie<sup>a</sup> and Shi-Yong Zhang<sup>a</sup>

<sup>a</sup>Jiangxi Key Laboratory of Function of Materials Chemistry, College of Chemistry and Chemical Engineering, Gannan Normal University, Ganzhou, 341000, P. R. China.

<sup>b</sup>Beijing National Laboratory for Molecular Sciences, Center for Molecular Science, Key Laboratory of Organic Solids, Institute of Chemistry, Chinese Academy of Sciences, Beijing 100190, P. R. China.

<sup>c</sup>School of Metallurgy and Chemical Engineering, Jiangxi University of Science and Technology, Ganzhou 341000, Jiangxi Province, P.R. China.

E-mail: ybluhm@163.com, cmliu@iccas.ac.cn.

**Table S1.** Selected Bond Lengths (Å) for **1-4**.

| Complex Eu <b>1</b> |          |               |            |
|---------------------|----------|---------------|------------|
| Eu(1)-O(1)          | 2.347(3) | Eu(1)-N(1)    | 2.572(4)   |
| Eu(1)-O(2)A1        | 2.393(3) | Eu(1)-Cl(1)   | 2.7713(10) |
| Eu(1)-N(3)          | 2.552(4) | Eu(1)-Cl(1)A1 | 2.7736(11) |
| Eu(1)-N(4)          | 2.553(4) | Eu(1)-Eu(1)A1 | 3.9460(4)  |
| Eu(1)-N(2)          | 2.564(4) |               |            |
| Complex Tb <b>2</b> |          |               |            |
| Tb(1)-O(1)          | 2.322(3) | Tb(1)-N(3)    | 2.553(3)   |
| Tb(1)-O(2)A1        | 2.370(2) | Tb(1)-Cl(1)   | 2.7504(9)  |
| Tb(1)-N(1)          | 2.526(3) | Tb(1)-Cl(1)A1 | 2.7491(8)  |
| Tb(1)-N(2)          | 2.535(3) | Tb(1)-Tb(1)A1 | 3.9131(3)  |
| Tb(1)-N(4)          | 2.542(3) |               |            |
| Complex Gd <b>3</b> |          |               |            |
| Gd(1)-O(1)          | 2.341(3) | Gd(1)-N(8)    | 2.562(4)   |
| Gd(1)-O(2)A1        | 2.384(3) | Gd(1)-Cl(1)   | 2.7640(11) |
| Gd(1)-N(5)          | 2.540(4) | Gd(1)-Cl(1)A1 | 2.7595(10) |
| Gd(1)-N(6)          | 2.549(4) | Gd(1)-Gd(1)A1 | 3.9313(4)  |
| Gd(1)-N(7)          | 2.551(4) |               |            |
| Complex Dy <b>4</b> |          |               |            |

|              |          |               |           |
|--------------|----------|---------------|-----------|
| Dy(1)-O(1)   | 2.358(2) | Dy(1)-N(11)   | 2.542(3)  |
| Dy(1)-O(2)A1 | 2.314(3) | Dy(1)-Cl(1)   | 2.7364(9) |
| Dy(1)-N(13)  | 2.525(3) | Dy(1)-Cl(1)A1 | 2.7415(9) |
| Dy(1)-N(14)  | 2.530(3) | Dy(1)-Dy(1)A1 | 3.8975(4) |
| Dy(1)-N(12)  | 2.530(3) |               |           |

Symmetry Codes for **1**, A:  $-x+1, -y+2, -z+1$ ; For **2**, A:  $-x+1, -y+1, -z+1$ ; For **3**, A:  $-x+1, -y+2, -z$ ; For **4**, A:  $-x+2, -y-1, -z$ .

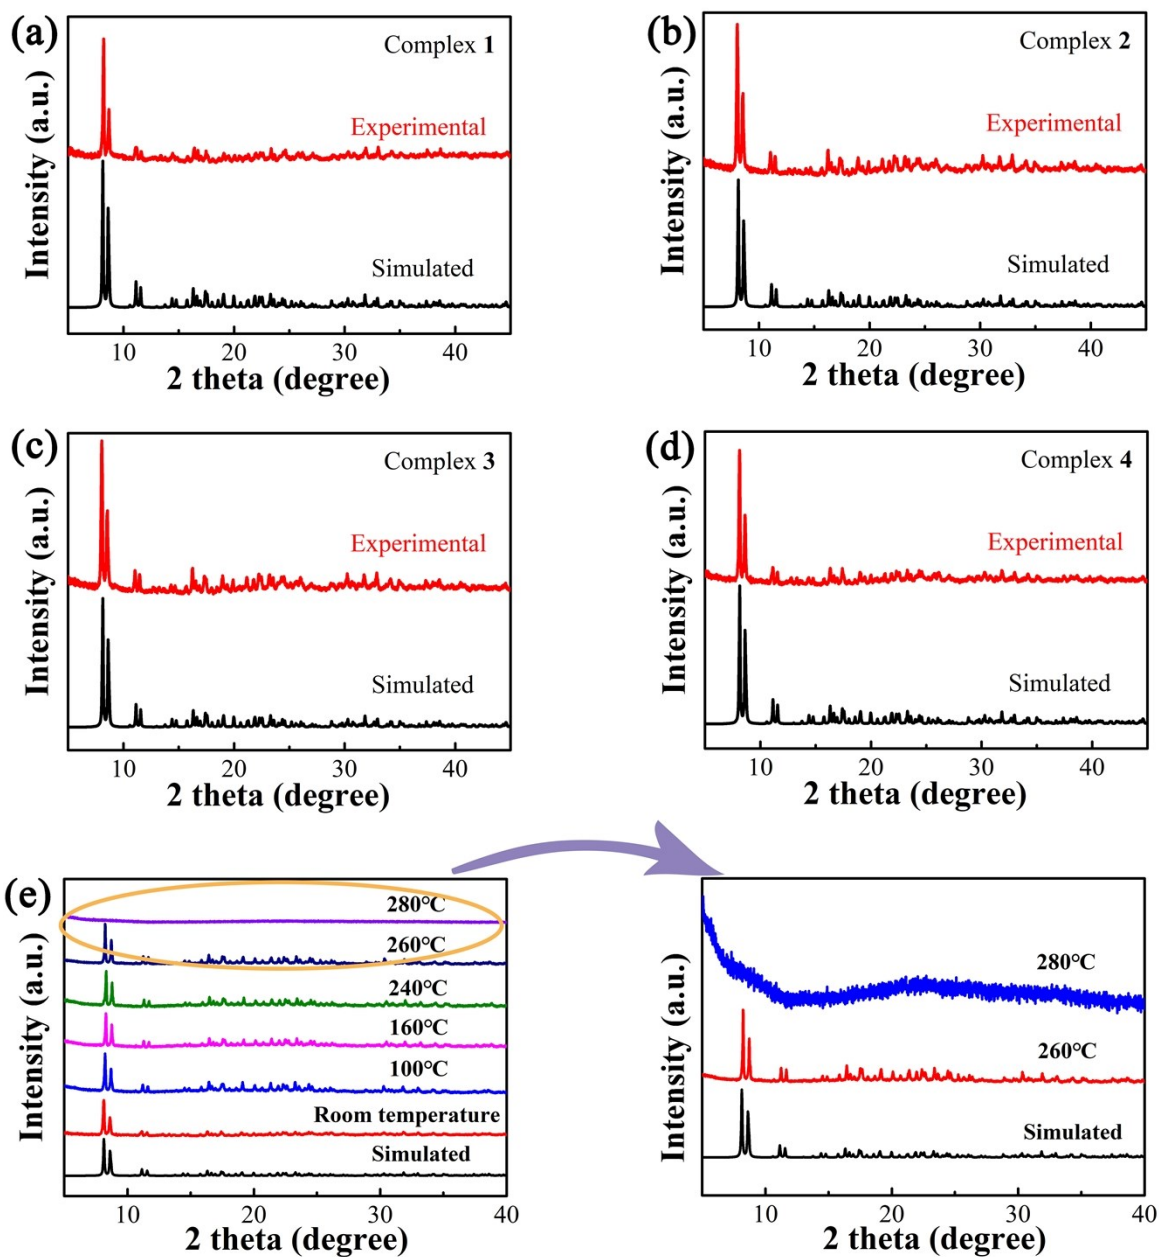

**Figure S1.** Powder X-ray diffraction patterns of **1** (a), **2** (b), **3** (c) and **4** (d), [and the variable-temperature PXRD patterns of complex 4 \(e\)](#)

**Table S2.** Summary of SHAPE analysis for **4**.

| label    | shape                                             | symmetry                   | Distortion( $\tau$ ) |
|----------|---------------------------------------------------|----------------------------|----------------------|
| OP-8     | Octagon                                           | $D_{8h}$                   | 18.163               |
| HPY-8    | Heptagonal pyramid                                | $C_{7v}$                   | 15.308               |
| HBPY-8   | Hexagonal bipyramid                               | $D_{6h}$                   | 21.227               |
| CU-8     | Cube                                              | $O_h$                      | 27.501               |
| SAPR-8   | Square antiprism                                  | $D_{4d}$                   | 21.276               |
| TDD-8    | Triangular dodecahedron                           | $D_{2d}$                   | 22.005               |
| JGBF-8   | Johnson gyrobifastigium J26                       | $D_{2d}$                   | 17.894               |
| JETBPY-8 | <b>Johnson elongated triangular bipyramid J14</b> | <b><math>D_{3h}</math></b> | <b>14.393</b>        |
| JBTPR-8  | Biaugmented trigonal prism J50                    | $C_{2v}$                   | 17.876               |
| BTPR-8   | Biaugmented trigonal prism                        | $C_{2v}$                   | 18.496               |
| JSD-8    | Snub diphenoid J84                                | $D_{2d}$                   | 19.911               |
| TT-8     | Triakis tetrahedron                               | $T_d$                      | 27.509               |
| ETBPY-8  | Elongated trigonal bipyramid                      | $D_{3h}$                   | 15.380               |

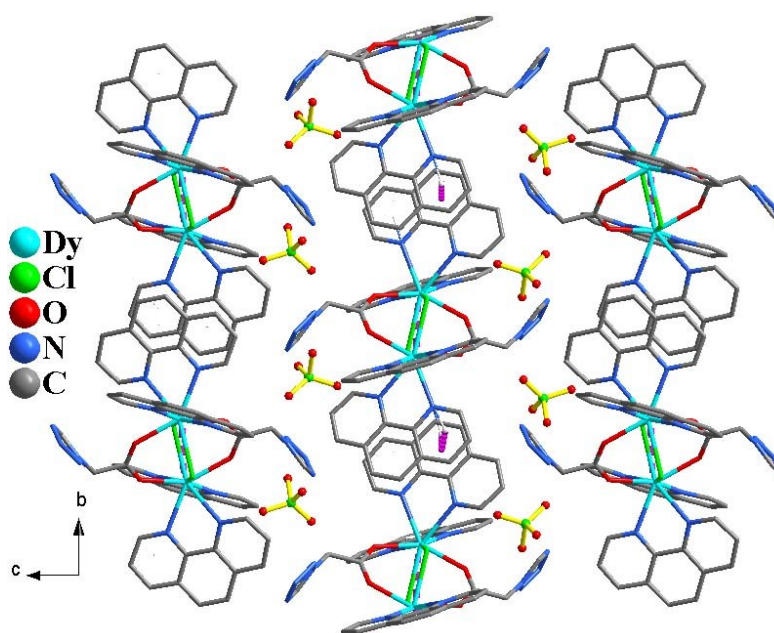

**Figure S2.** The counteranions  $[\text{ClO}_4]^-$  lying between the layers along the  $bc$  plane in 4.

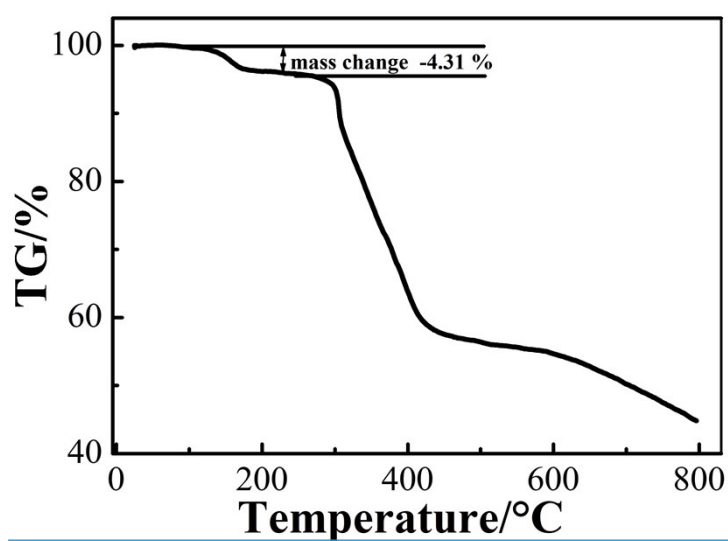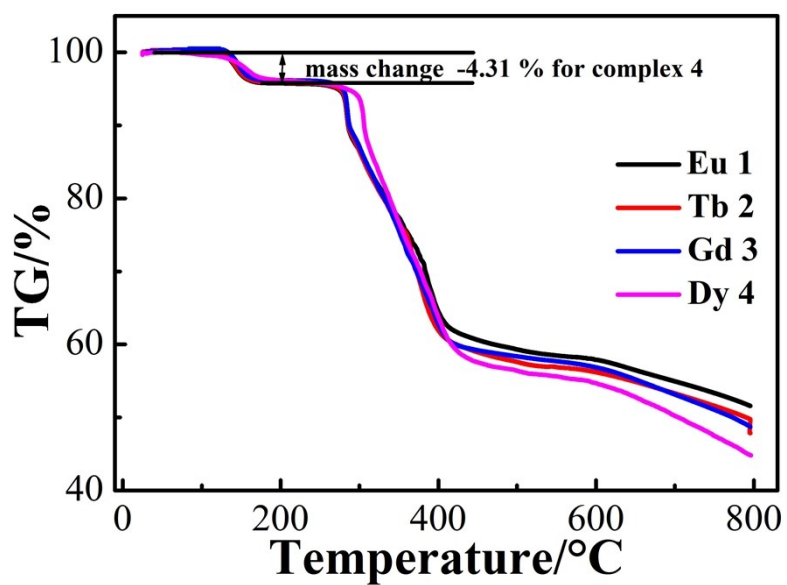

**Figure S3.** The TGA plot of 1-4.

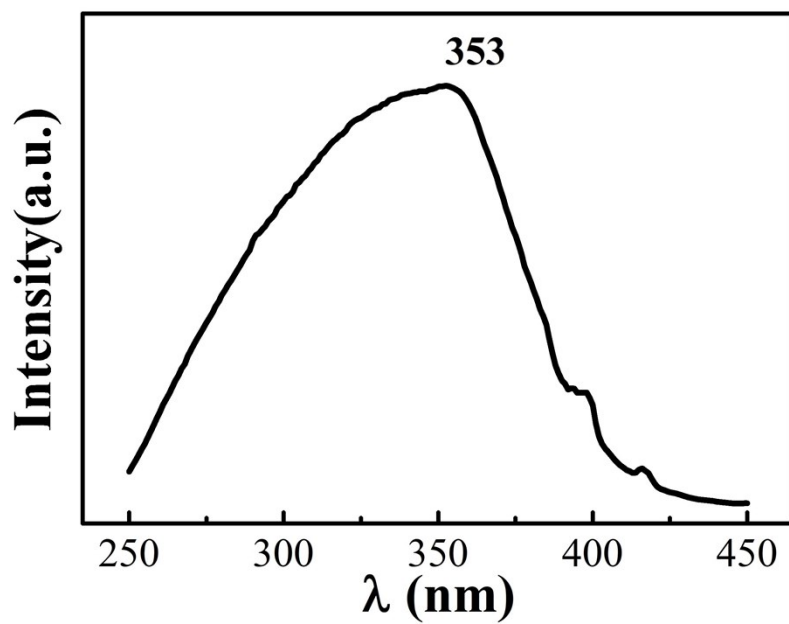

Figure S4. Solid-state excitation spectra at room temperature for **1**.

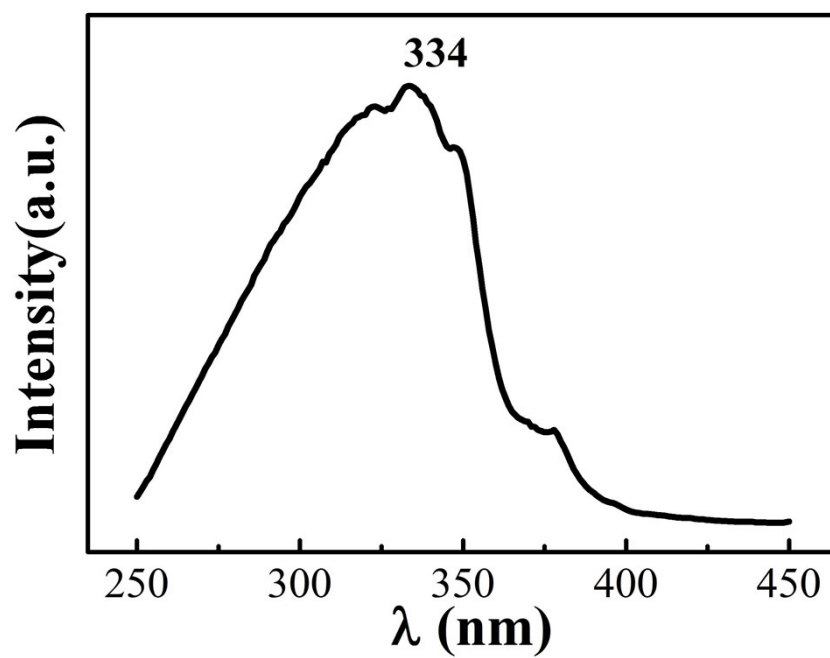

Figure S5. Solid-state excitation spectra at room temperature for **2**.

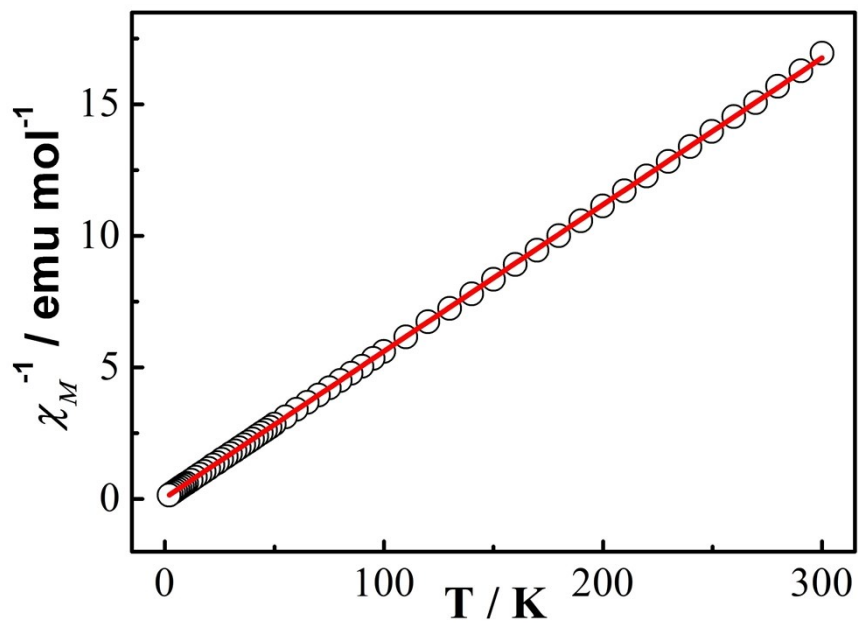

**Figure S6.** Temperature evolution of the inverse magnetic susceptibility for **3** between 2 and 300 K.

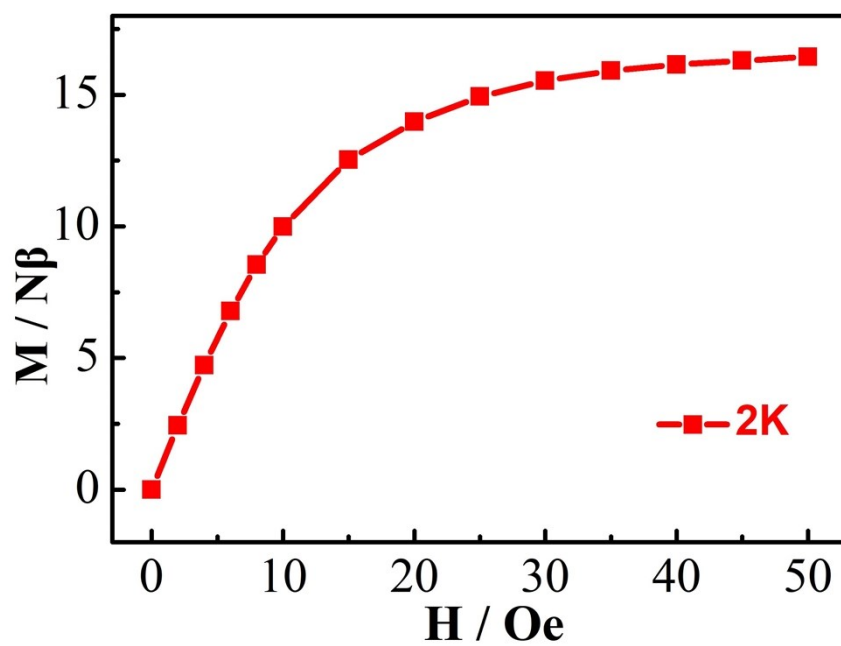

**Figure S7.** The  $M$  vs.  $H$  plot for 0–5 T at 2 K for **3**.

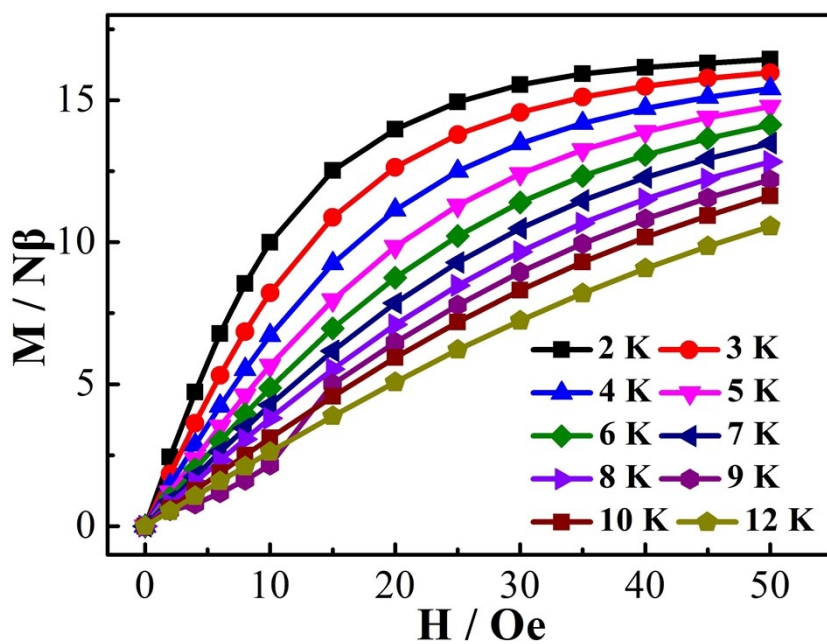

**Figure S8.** The  $M$  vs  $H$  curves of **3** at  $T = 2$ -12 K and  $H = 0$ -50 kOe for **3**.

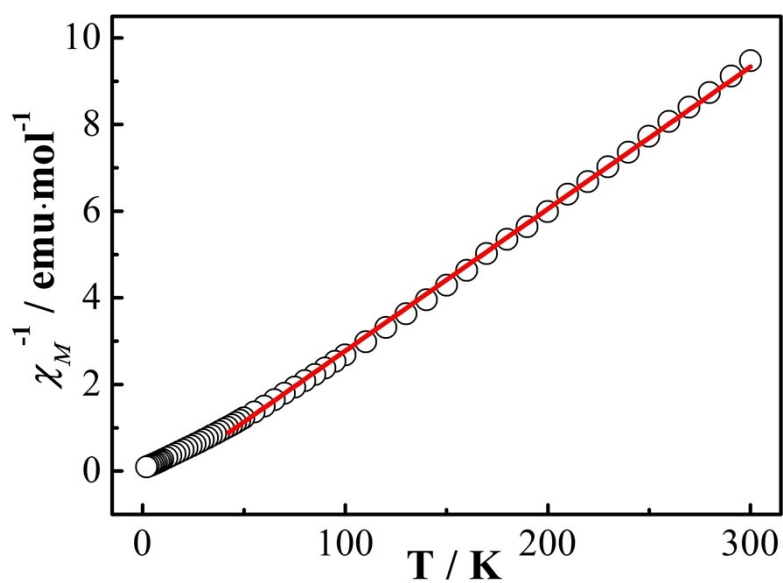

**Figure S9.** Temperature evolution of the inverse magnetic susceptibility for **4** between 40 and 300 K.

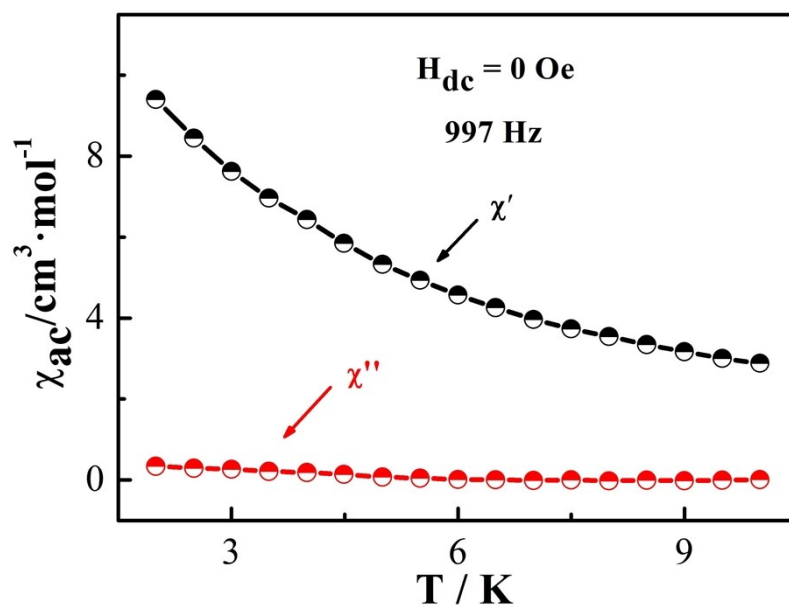

**Figure S10.** ac susceptibility measurements at frequency with 977 Hz for **4** at  $H_{dc} = 0 \text{ Oe}$ ,  $H_{ac} = 2.5 \text{ Oe}$ .

**Table S3.** Linear combination of two modified Debye model fitting parameters from 2 and 2.5 K of **4** under 1000 Oe dc field.

| $T$ (K) | $\tau_1$ (s) | $\alpha_1$ | $\tau_2$ (s) | $\alpha_2$ |
|---------|--------------|------------|--------------|------------|
| 2       | 0.000279378  | 0.223      | 0.00467199   | 0.019      |
| 2.5     | 0.000155311  | 0.186      | 0.00238555   | 0.030      |



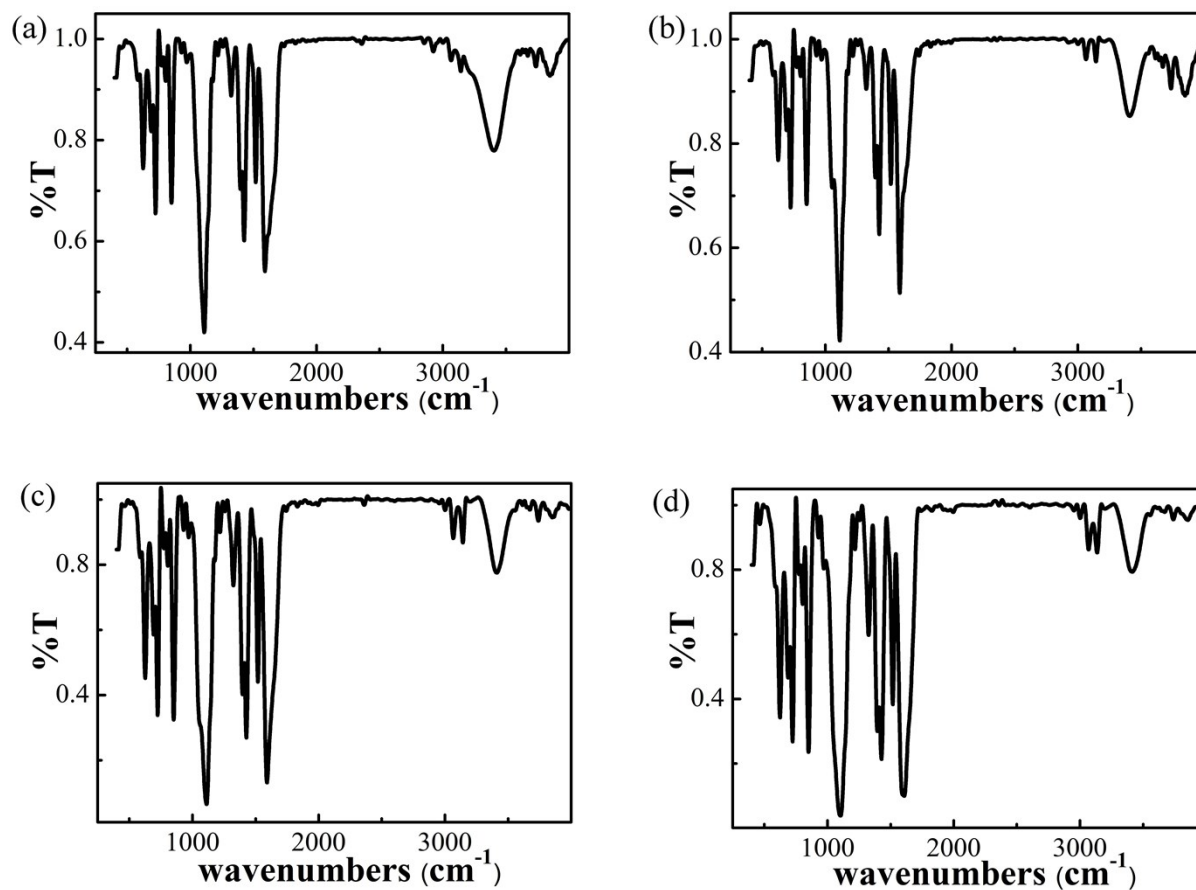

**Figure S11.** IR spectra for **1** (a), **2** (b), **3** (c) and **4** (d).
